# Supplementary material for: Formation of an endometrial epithelial monolayer in a microfluidic device with human tissue-derived endometrial organoids
Source: Royal Society of Chemistry journal article supplement (doi:10.1039/d5lc00278h), 2026-01-01
Supplement: d5lc00278h5.xlsx [file d5lc00278h5.xlsx]

## Sheet: Table 1.
Table 1. Expansion medium (ExM) compositioin
ExM media	Company	Product No.	Final concentration
Product
DMEM/F12, HEPES	Gibco	11330032	1x
N2 supplement	Gibco	17502048	1x
B-27 supplement w/o vit A	Gibco	12587010	1x
GlutaMAX	Gibco	35050061	1x
Penicillin-Streptomycin	Gibco	15140122	1x
Nicotinamide	Sigma-Aldrich	N0636	10 mM
N-Acetyl-L-Cysteine	Sigma-Aldrich	A9165	1.25 mM
Animal-free recombinant human EGF	Peprotech	AF-100-15	50 ng/mL
Recombinant human HGF (HEK 293 derived)	Peprotech	100-39H	50 ng/mL
Recombinant human FGF-10	Peprotech	100-26	100 ng/mL
Recombinant human Noggin	Peprotech	120-10C	100 ng/mL
A 83-01 (TGFβ/Alk inhibitor)	Sigma-Aldrich	SML0788	500 mM
Recombinant human R-Spondin-1	Peprotech	120-38	500 ng/mL
Wnt-3a	Home made	5036-WN	100 ng/mL
Hormone information	Company	Product No.	Final concentration
Product
β-estradiol (E2)	Sigma-Aldrich	E4389	10 nM
Progesterone (P4)	Sigma-Aldrich	P7556	1 µM
8-Bromoadenosine 3’5’-cyclic monophosphate (cAMP)	Sigma-Aldrich	B7880	1 µM

## Sheet: Table 2.
Table 2. Antibody list
Antibody	Company	Product No.	dilution
E-cadherin	Cell Signaling Technology	3195	1:400 (IHC)
ERɑ	Santa Cruz	sc-8002	1:100 (IF), 1:40 (IHC)
MUC1	Abcam	ab15481	1:100 (IF), 1:100 (IHC)
Laminin	Abcam	ab11575	1:50 (IF), 1:50 (IHC)
Acetyl-ɑ-tubulin	Cell Signaling Technology	12152	1:800 (IF), 1:500 (IHC)

## Sheet: Table 3.
Table 3. Primer table
Target gene	Species	Forward (5'-3')	Reverse (3'-5')
GAPDH	Human	AACGGGAAGCTTGTCATCAA	TGGACTCCACGACGTACTCA
ESR1	Human	GGAGACGGACCAAAGCCACT	CAGGGATTATCTGAACCGTGTGG
PGR	Human	TGCCTGAAGTTTCGGCCATA	GACTGCTGGTCCTGCGTCTTT
PAEP	Human	CTGAGGGTCCACATCACCTCA	TCTCCAAGGACCTTCTTCTCAACA

## Sheet: Table 4.
Table 3. Donor metadata
Donor ID	Age	Menopausal status	Cycle phase	Phase assignment	Indication for sampling	Final pathology	Sampling method	Sampling site	Hormone exposure	Ultrasound EMT mm	Comorbidities/Notes	Sampling date
D26	37	Pre	Unknown	TV-USG/LMP (NA)	Endometrial polyp	Endometrial polyp	Hysteroscopic resection	Uterine body (NA)	no exogenous hormone exposure	21.7 (2016-12)	Polypectomy 2019-08-28; recurrence 2020-05	2019-08-28
D83	27	Pre	Unknown	NA	Endometrial polyp	Endometrial polyp	Hysteroscopic resection	Uterine body (NA)	no exogenous hormone exposure	NA	Recurrent polyp; last F/U 2021-06-08	2021-05-03
