# Supplementary figures and images for: Formation of an endometrial epithelial monolayer in a microfluidic device with human tissue-derived endometrial organoids
Source: Royal Society of Chemistry journal article supplement (doi:10.1039/d5lc00278h), 2026-01-01

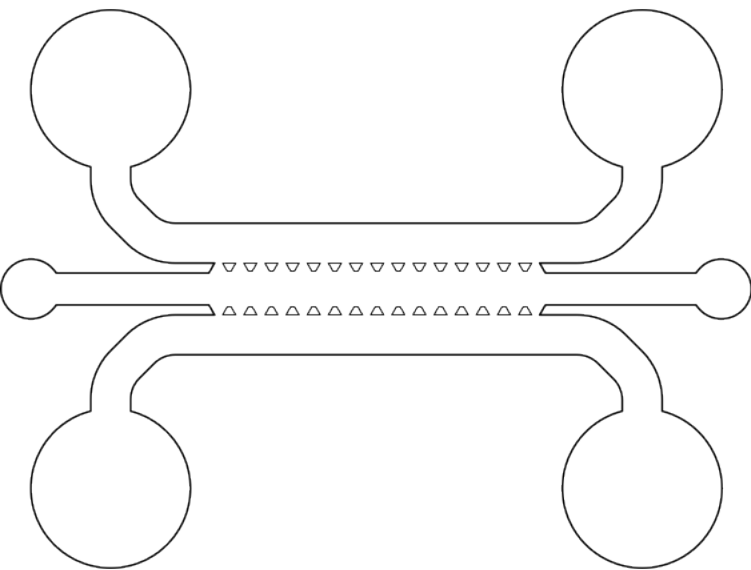

**b.**

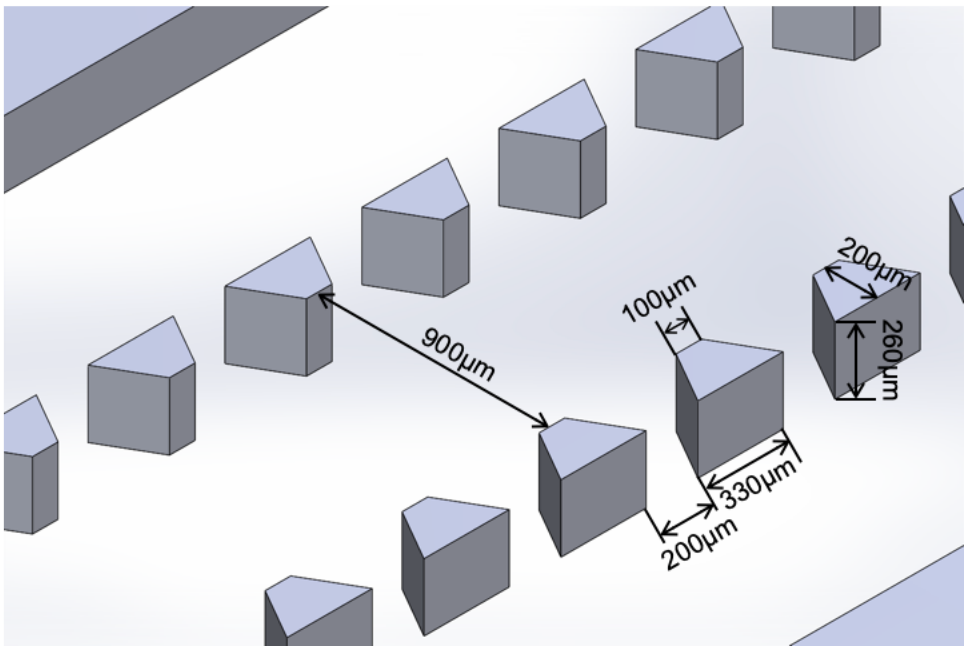

Supplement: d5lc00278h1.pdf [file d5lc00278h1.pdf]
